# Supplementary material for: Polynuclear and mixed-ligand mononuclear CuI complexes with N-thiophosphorylated thioureas and 1,10-phenanthroline or PPh3
Source: Royal Society of Chemistry journal article supplement (doi:10.1039/c0dt00866d), 2010-01-01
Supplement: c0dt00866d.pdf [file c0dt00866d.pdf]

## Supporting Information

### Polynuclear and mixed-ligand mononuclear Cu<sup>I</sup> complexes with *N*-thiophosphorylated thioureas and 1,10-phenanthroline or PPh<sub>3</sub>

Damir A. Safin,<sup>a,b</sup> Maria G. Babashkina,<sup>\*a</sup> Axel Klein,<sup>a</sup> Michael Bolte,<sup>c</sup> Tania Pape,<sup>d</sup> F. Ekkehardt Hahn,<sup>d</sup> Maxim L. Verizhnikov,<sup>b</sup> Airat R. Bashirov<sup>b</sup> and Axel Klein<sup>a</sup>

<sup>a</sup> *Institut für Anorganische Chemie, Universität zu Köln, Greinstrasse 6, D-50939 Köln, Germany. Fax: +49 221 4705196; Tel: +49 221 4702913; E-mail: maria.babashkina@ksu.ru.*

<sup>b</sup> *JSC «DANAFLEX», Rodina Str. 7, 420087 Kazan, Russian Federation.*

<sup>c</sup> *Institut für Anorganische Chemie J.-W.-Goethe-Universität, Frankfurt/Main, Germany.*

<sup>d</sup> *Institut für Anorganische und Analytische Chemie, Westfälische Wilhelms-Universität Münster, Corrensstrasse 36, D-48149 Münster, Germany.*

**Table S1** Selected bond lengths [Å] and bond angles [°] for [Cu<sub>4</sub>L<sup>I</sup><sub>4</sub>]

*Bond lengths*

|                |            |                 |            |
|----------------|------------|-----------------|------------|
| Cu(1)···Cu(1C) | 2.8682(13) | Cu(1A)···Cu(1C) | 2.8956(13) |
| Cu(1)···Cu(1B) | 2.9420(13) | Cu(1A)···Cu(1B) | 2.9712(12) |

*Bond angles*

|                    |           |                    |           |
|--------------------|-----------|--------------------|-----------|
| S(1)–Cu(1)–S(2C)   | 132.72(8) | S(2B)–Cu(1B)–S(1)  | 130.71(8) |
| S(1)–Cu(1)–S(2)    | 113.67(8) | S(2B)–Cu(1B)–S(1B) | 114.07(8) |
| S(2C)–Cu(1)–S(2)   | 111.17(8) | S(1)–Cu(1B)–S(1B)  | 113.32(8) |
| S(2A)–Cu(1A)–S(2B) | 136.42(8) | S(2C)–Cu(1C)–S(2A) | 135.37(8) |
| S(2A)–Cu(1A)–S(1A) | 113.93(8) | S(2C)–Cu(1C)–S(1C) | 114.35(8) |
| S(2B)–Cu(1A)–S(1A) | 107.97(8) | S(2A)–Cu(1C)–S(1C) | 108.63(8) |

**Table S2** Selected bond lengths [Å] and bond angles [°] for [Cu<sub>8</sub>L<sup>II</sup><sub>8</sub>]

*Bond lengths*

|               |           |               |           |
|---------------|-----------|---------------|-----------|
| Cu(1)···Cu(2) | 2.6914(8) | Cu(4)···Cu(5) | 2.8147(8) |
| Cu(1)···Cu(8) | 2.7496(8) | Cu(4)···Cu(6) | 2.6889(8) |
| Cu(2)···Cu(3) | 2.8112(8) | Cu(6)···Cu(7) | 2.7449(8) |
| Cu(3)···Cu(5) | 2.6684(8) | Cu(7)···Cu(8) | 2.7447(7) |

*Bond angles*

|                 |           |                   |           |
|-----------------|-----------|-------------------|-----------|
| S(2)–Cu(1)–S(1) | 110.72(4) | S(10)–Cu(5)–S(9)  | 110.41(4) |
| S(4)–Cu(2)–S(3) | 110.55(4) | S(12)–Cu(6)–S(11) | 110.54(4) |
| S(6)–Cu(3)–S(5) | 109.99(4) | S(14)–Cu(7)–S(13) | 111.04(4) |
| S(8)–Cu(4)–S(7) | 110.88(4) | S(16)–Cu(8)–S(15) | 110.93(4) |

**Table S3** Hydrogen bond lengths [Å] and angles [°] for [Cu<sub>8</sub>L<sup>II</sup><sub>8</sub>] and [Cu<sub>3</sub>L<sup>III,IV</sup><sub>3</sub>]

| Complex                                          | D–H···A              | d(D–H)    | d(H···A) | d(D···A) | ∠(DH<br>A) |
|--------------------------------------------------|----------------------|-----------|----------|----------|------------|
| [Cu <sub>8</sub> L <sup>II</sup> <sub>8</sub> ]  | N(2)–H(2N)···S(6)    | 0.88      | 2.48     | 3.359(4) | 172        |
|                                                  | N(4)–H(4N)···S(16)   | 0.88      | 2.49     | 3.371(4) | 174        |
|                                                  | N(6)–H(6N)···S(8)    | 0.88      | 2.51     | 3.384(4) | 175        |
|                                                  | N(8)–H(8N)···S(14)   | 0.88      | 2.51     | 3.391(4) | 174        |
|                                                  | N(10)–H(10N)···S(4)  | 0.88      | 2.50     | 3.375(4) | 176        |
|                                                  | N(12)–H(12N)···S(10) | 0.88      | 2.50     | 3.374(4) | 173        |
|                                                  | N(14)–H(14N)···S(2)  | 0.88      | 2.48     | 3.361(4) | 174        |
|                                                  | N(16)–H(16N)···S(12) | 0.88      | 2.52     | 3.398(4) | 175        |
| [Cu <sub>3</sub> L <sup>III</sup> <sub>3</sub> ] | N(2)–H(2)···S(1)     | 0.86(3)   | 2.92(3)  | 3.747(2) | 163(2)     |
| [Cu <sub>3</sub> L <sup>IV</sup> <sub>3</sub> ]  | N(4)–H(4)···S(3)     | 0.904(10) | 2.72(2)  | 3.542(3) | 152(2)     |
|                                                  | N(5)–H(5)···S(1)     | 0.908(10) | 2.99(2)  | 3.861(2) | 161(3)     |
|                                                  | N(6)–H(6)···S(2)     | 0.900(10) | 2.86(2)  | 3.629(2) | 144(3)     |

**Table S4** Selected bond lengths [Å] and bond angles [°] for [Cu<sub>3</sub>L<sup>III</sup><sub>3</sub>]

*Bond lengths*

---

|                |           |                |           |
|----------------|-----------|----------------|-----------|
| Cu(1)···Cu(1)a | 3.8360(5) | Cu(1)···Cu(1)b | 3.8360(4) |
|----------------|-----------|----------------|-----------|

*Bond angles*

|                 |           |                 |          |
|-----------------|-----------|-----------------|----------|
| S(1)–Cu(1)–S(2) | 114.27(2) | Cu(1)–S(1)–P(1) | 93.13(3) |
|-----------------|-----------|-----------------|----------|

|                  |           |                 |           |
|------------------|-----------|-----------------|-----------|
| S(1)–Cu(1)–S(2)a | 134.34(2) | Cu(1)–S(2)–C(1) | 106.12(7) |
|------------------|-----------|-----------------|-----------|

|                  |           |                   |           |
|------------------|-----------|-------------------|-----------|
| S(2)–Cu(1)–S(2)a | 111.30(2) | Cu(1)–S(2)–Cu(1)b | 120.27(3) |
|------------------|-----------|-------------------|-----------|

---

Symmetry transformations used to generate equivalent atoms: 1 – y, 1 + x – y, z; –x + y, 1 – x, z.

**Table S5** Selected bond lengths [Å] and bond angles [°] for [Cu<sub>3</sub>L<sup>IV</sup><sub>3</sub>]

*Bond lengths*

---

|               |           |               |           |
|---------------|-----------|---------------|-----------|
| Cu(1)···Cu(2) | 3.6392(5) | Cu(2)···Cu(3) | 3.5374(5) |
|---------------|-----------|---------------|-----------|

|               |           |
|---------------|-----------|
| Cu(1)···Cu(3) | 3.7782(5) |
|---------------|-----------|

*Bond angles*

|                 |           |                 |           |
|-----------------|-----------|-----------------|-----------|
| S(1)–Cu(1)–S(4) | 134.09(3) | S(4)–Cu(2)–S(5) | 117.22(3) |
|-----------------|-----------|-----------------|-----------|

|                 |           |                 |           |
|-----------------|-----------|-----------------|-----------|
| S(1)–Cu(1)–S(6) | 114.12(3) | S(3)–Cu(3)–S(5) | 114.54(3) |
|-----------------|-----------|-----------------|-----------|

|                 |           |                 |           |
|-----------------|-----------|-----------------|-----------|
| S(4)–Cu(1)–S(6) | 111.73(3) | S(3)–Cu(3)–S(6) | 129.94(3) |
|-----------------|-----------|-----------------|-----------|

|                 |           |                 |           |
|-----------------|-----------|-----------------|-----------|
| S(2)–Cu(2)–S(4) | 114.98(3) | S(5)–Cu(3)–S(6) | 115.50(3) |
|-----------------|-----------|-----------------|-----------|

|                 |           |
|-----------------|-----------|
| S(2)–Cu(2)–S(5) | 127.62(3) |
|-----------------|-----------|

---
